# Supplementary material
Source: Springer Nature journal article supplement (https://www.springermedizin.de/resource/supplementary/12888_2010_784_MOESM5_ESM.pdf/9478738)

Number of Patients

15  
10  
5  
0

0 1 2 3 4 5 6 7 8 9 10

Number of new symptoms

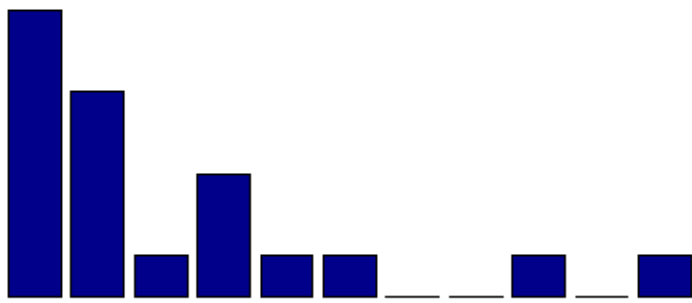

Supplement: MOESM5 [file 9478738]
